# Supplementary material
Source: PubMed Central journal article supplement (PMC5510478)
Supplement: NIHMS866597-supplement.pdf [file NIHMS866597-supplement.pdf]

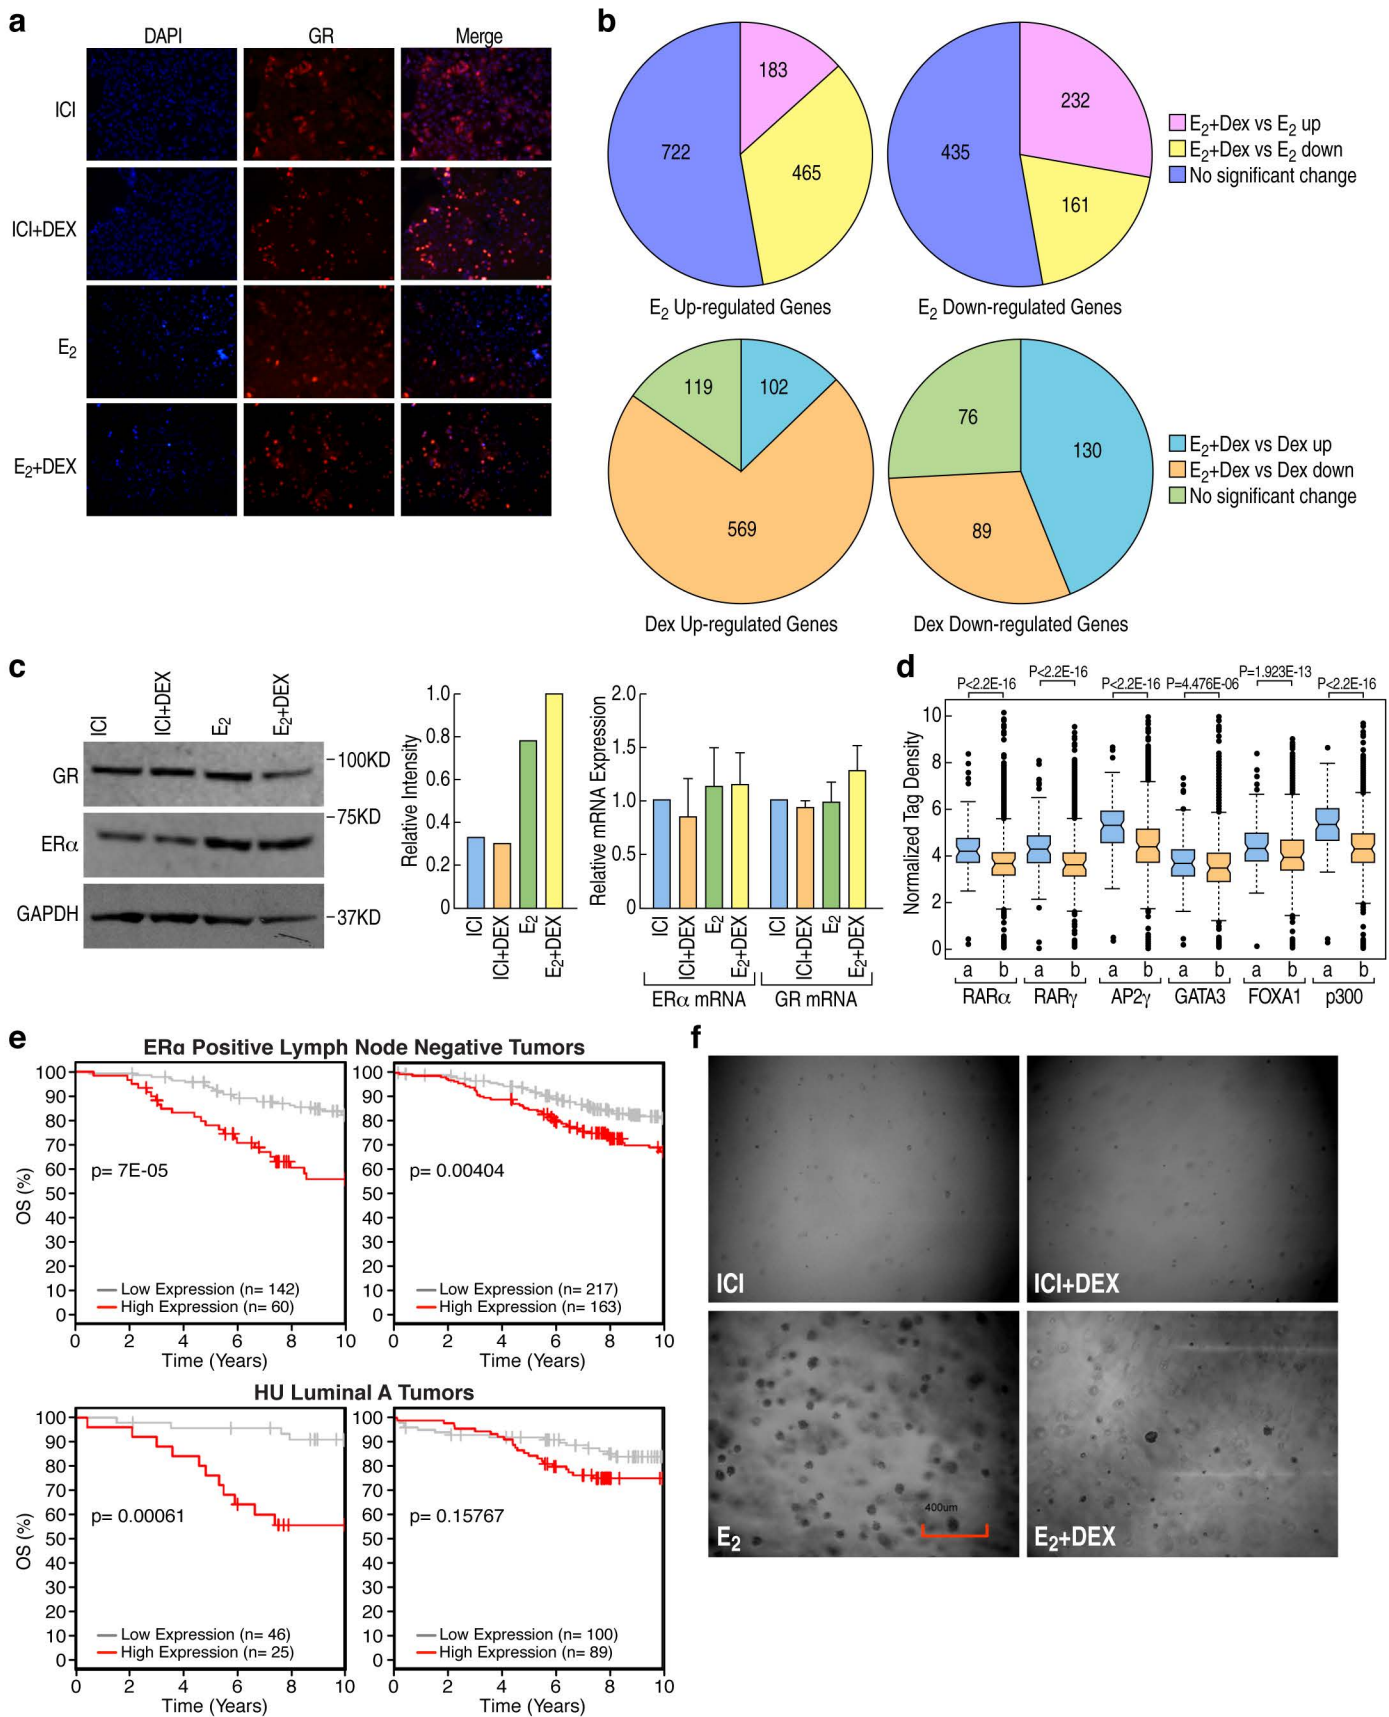

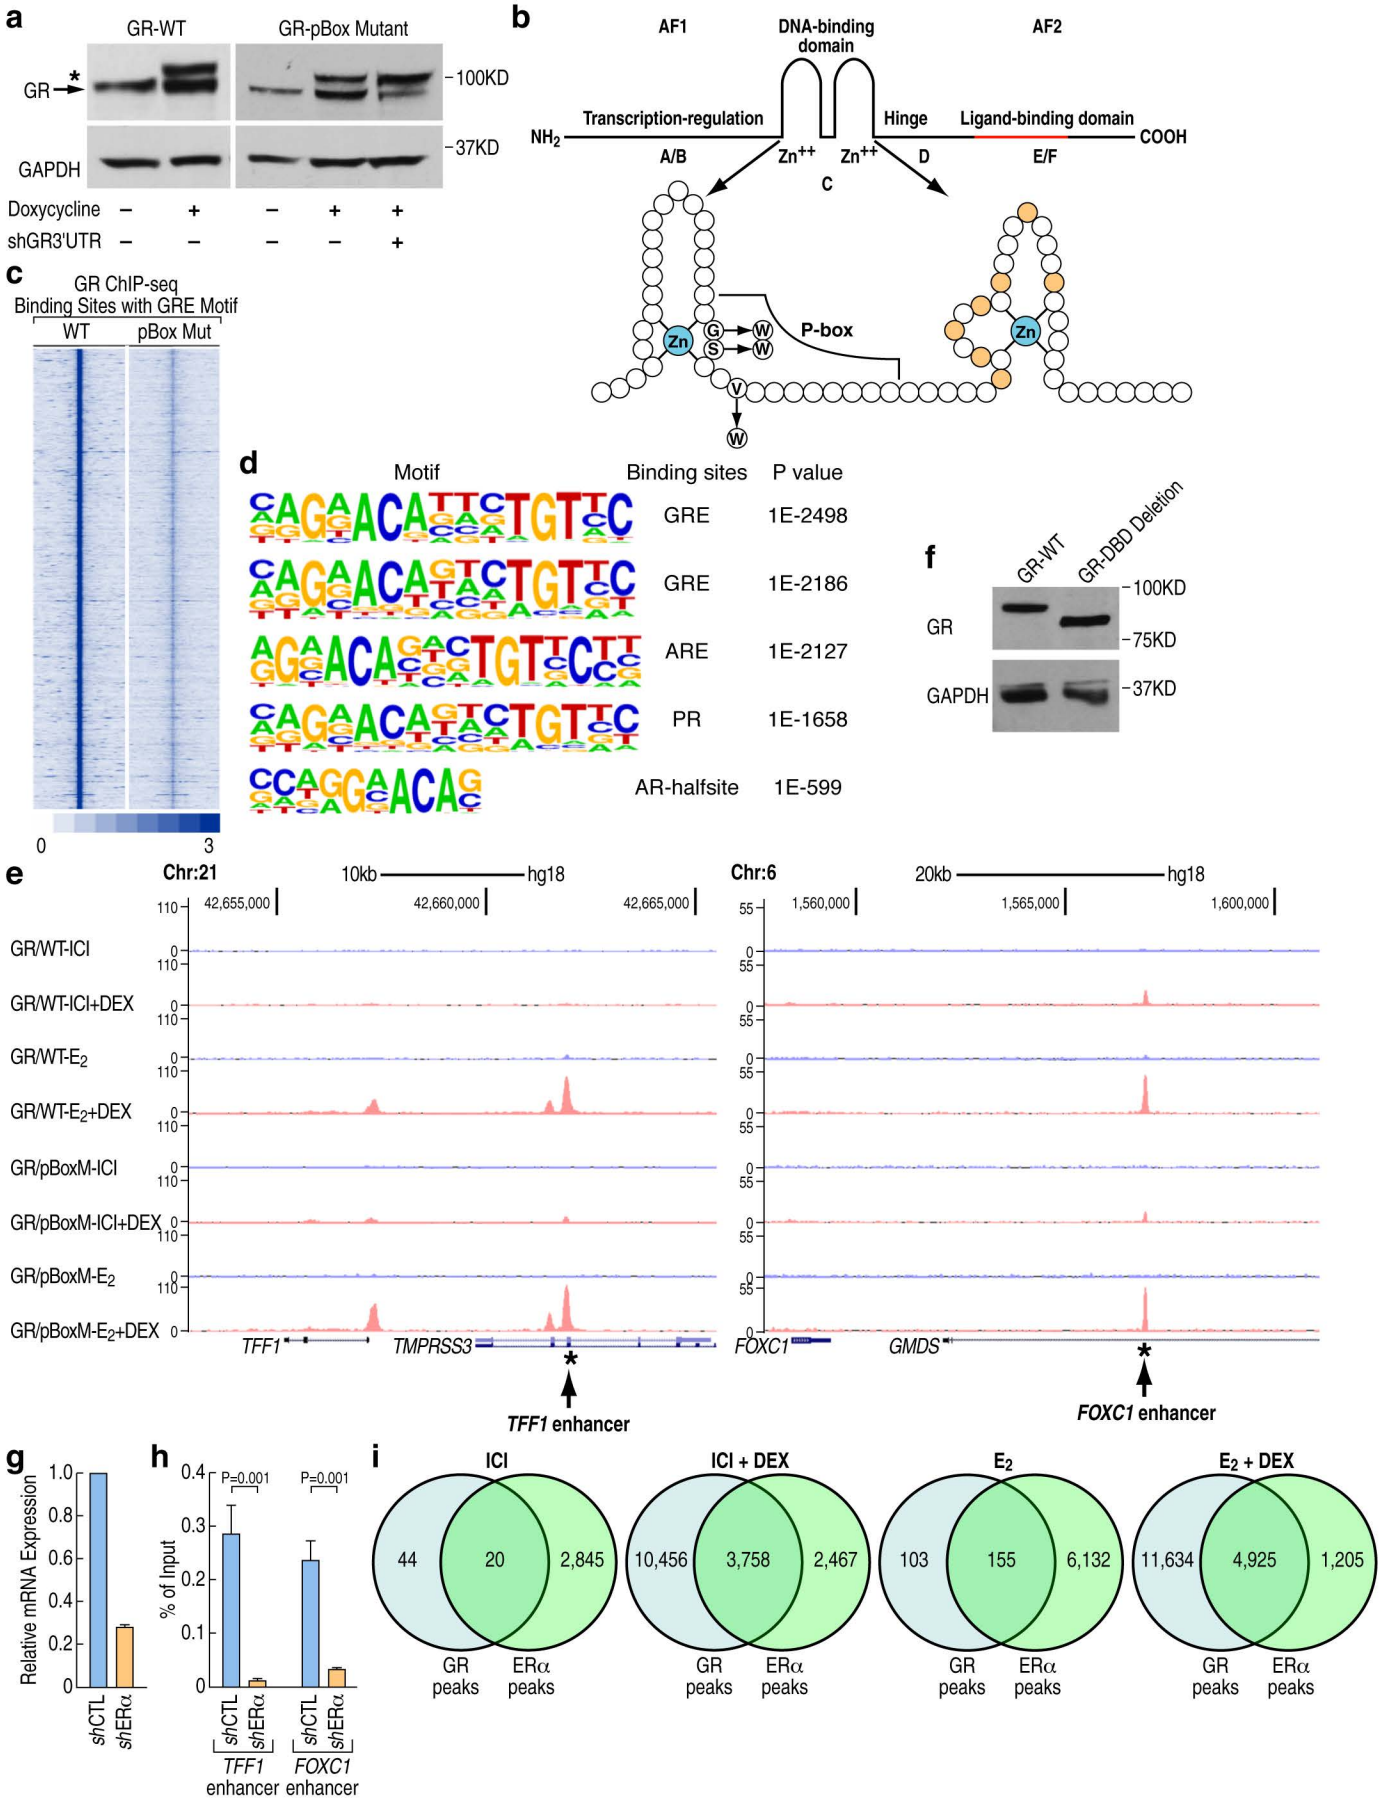

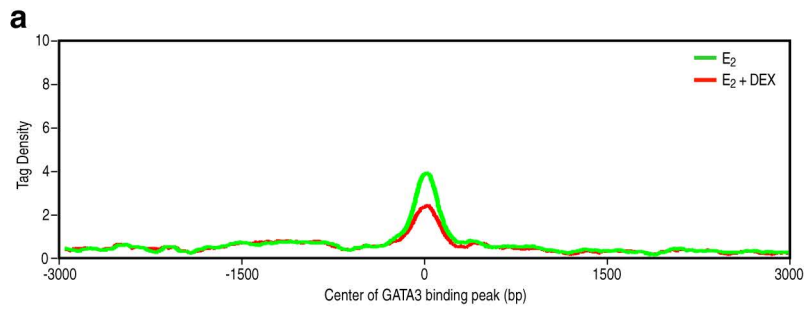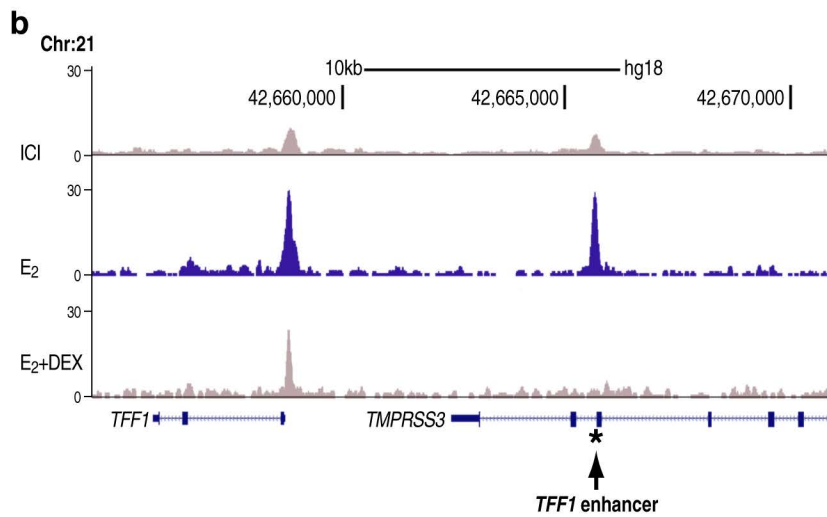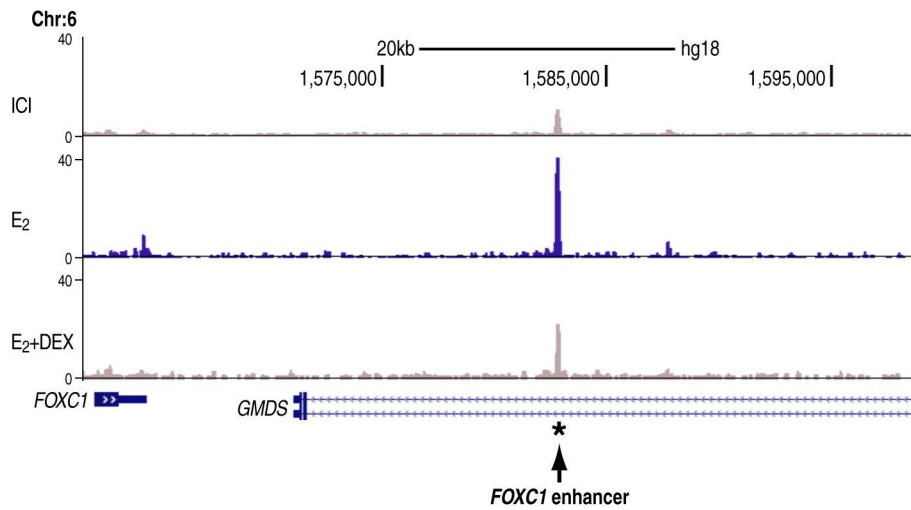

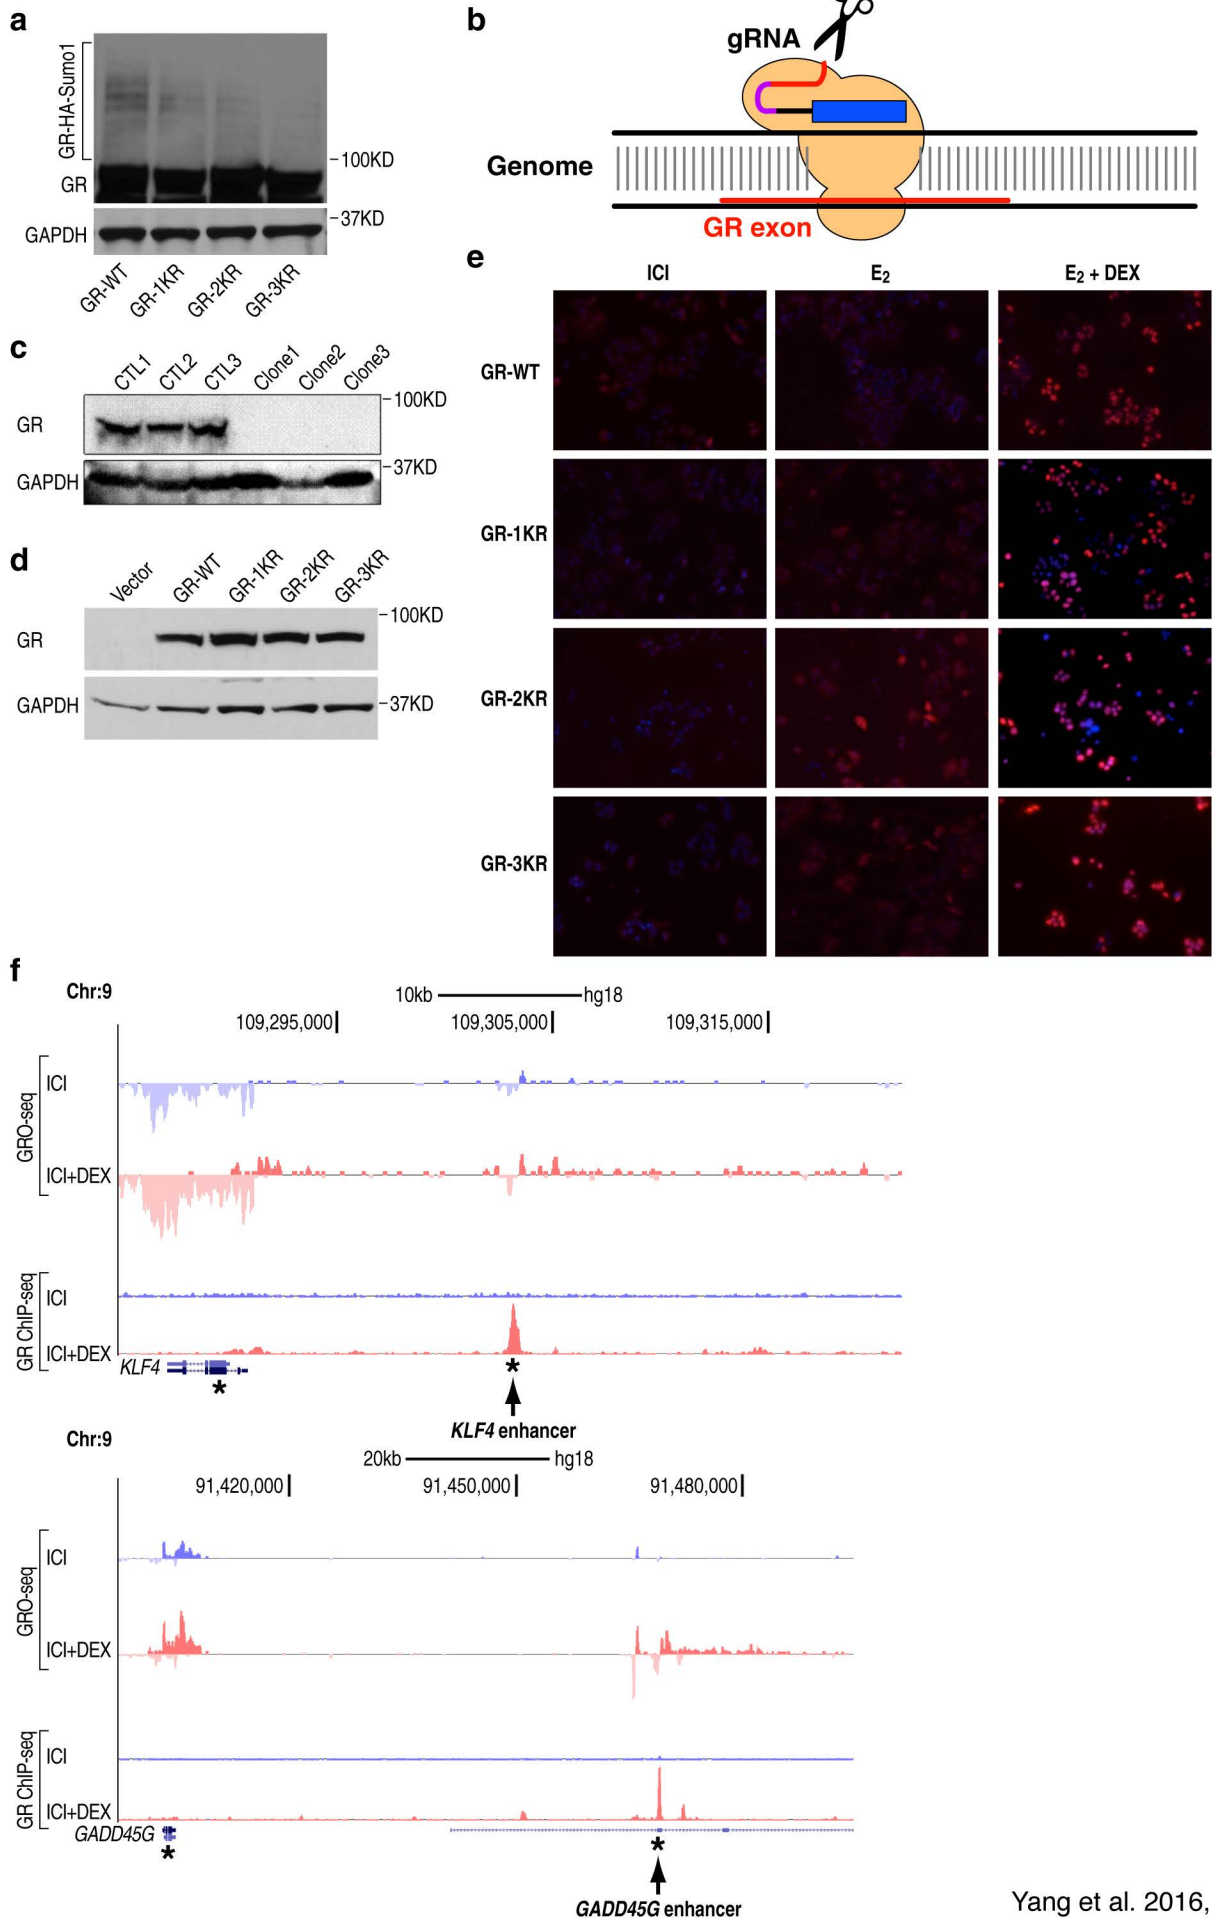

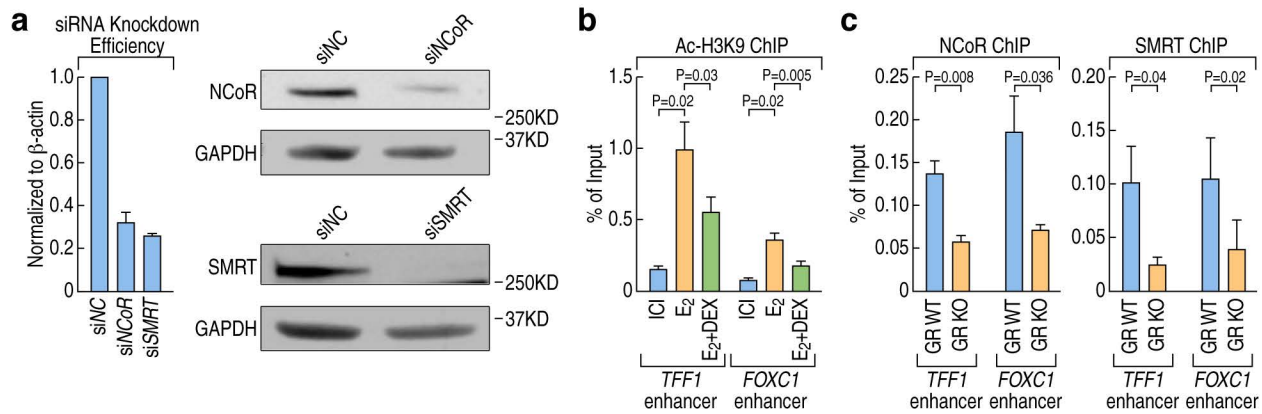

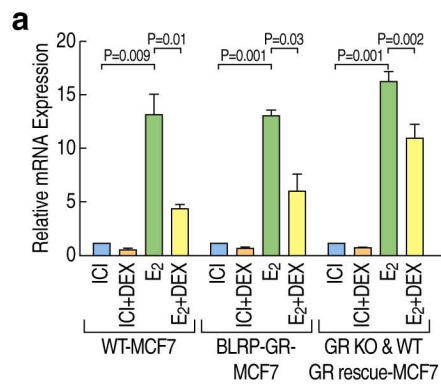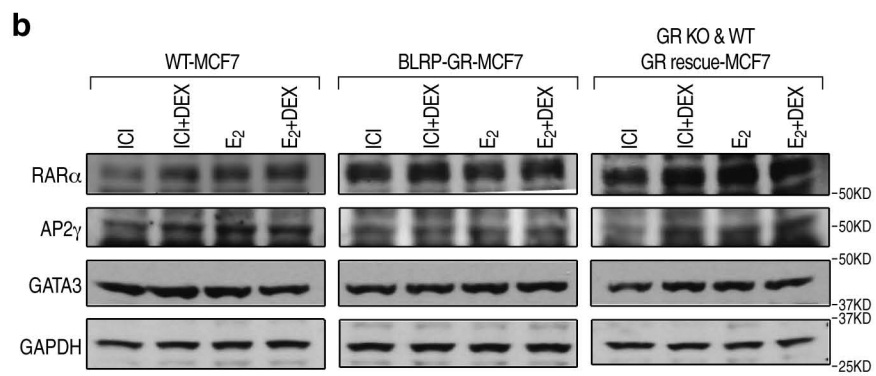

### **Figure S1 related Figure 1**

**(A)** Subcellular localization of GR examined by immunostaining in MCF7 cells when treated with different ligands (ICI, E<sub>2</sub>, Dex, E<sub>2</sub>+Dex). The cells were immunostained for GR (red) and costained with DAPI for DNA (blue).

**(B)** Area-proportional Venn diagram showing the number of differentially expressed genes when treated with different ligands based on GRO-seq data analysis.

**(C)** GR and ER $\alpha$  mRNA and protein levels did not show a significant change in MCF7 cells treated with different ligands (ICI, ICI+Dex, E<sub>2</sub>, E<sub>2</sub>+Dex), but the ICI treatment significantly reduced ER $\alpha$  expression level.

**(D)** Boxplot of normalized ChIP-seq tags density showing that MegaTrans complex (RAR $\alpha/\beta$ , AP2 $\gamma$ , GATA3, FOXA1) exhibits a strong binding on 423 E<sub>2</sub>+Dex down-regulated enhancers. (a represents 423 significantly down-regulated enhancers, b represents not significantly down-regulated enhancers upon treatment with E<sub>2</sub>+Dex compared to E<sub>2</sub> alone, P value is calculated by Wilcoxon rank sum test)

**(E)** Kaplan-Meier survival analyses for different breast cancer types using the 465 E<sub>2</sub>+Dex down-regulated genes (left panels) and 465 randomly selected E<sub>2</sub>-upregulated genes (right panels) as input. The breast cancer outcome-linked gene expression data were obtained interrogating the Gene Expression-Based Outcome for Breast Cancer Online (GOBO) tool. The high expression levels of the 465 genes are more significantly predictive of poor outcomes in ER positive lymph node negative breast cancer and HU Luminal A breast cancer patients than the randomly selected group. OS: overall survival

**(F)** Representative phase-contrast photomicrographs (10 $\times$  magnification) depicting colony formation in soft agar for MCF7 cells treated with different ligands (ICI, ICI+Dex, E<sub>2</sub>, E<sub>2</sub>+Dex). The scale bar was indicated.

### **Figure S2 related Figure 2**

**(A)** Western blots showing doxycycline-induced expression of BLRP-tagged GR wild type and pBox mutant (marked by asterisk) compared to the endogenous protein levels (marked by arrow) in MCF7 transduced with an shRNA targeting GR 3'UTR to inhibit the expression of endogenous GR.

- (B) Diagram of GR DNA-binding domain mutation. Arrows point out the mutation sites.
- (C) Heatmaps showing ChIP-seq signals for GR wild type and pBox mutant binding sites in MCF7 cells treated with E<sub>2</sub>+Dex. Heatmaps are centered on GRE-containing GR binding sites with scales indicated.
- (D) De novo motif analyses of GRE-containing GR binding sites by ChIP-seq.
- (E) UCSC genome browser (hg18) snapshot showing the ChIP-seq tracks for GR wild type and pBox mutant at the *TFF1* and *FOXCI* loci under different conditions (ICI, ICI+Dex, E<sub>2</sub>, E<sub>2</sub>+Dex). “\*” indicates the position of primers used for qPCR detection.
- (F) Western blot showing a similar expression level of GR protein in MCF7 cells stably expressing GR wild type and GR DBD deletion mutant.
- (G) shRNAs knockdown efficiency validation for ER $\alpha$  by RT-qPCR in MCF7 cells.
- (H) ChIP-qPCR showing GR binding on ER $\alpha$ -activated enhancers (*TFF1* and *FOXCI* enhancers) following shRNA-mediated knock down of ER $\alpha$  in MCF7 cells treated with E<sub>2</sub>+Dex. Data are represented as mean  $\pm$  SD. N $\geq$ 3, two-tailed Student’s t test.
- (I) Area-proportional Venn diagram showing the overlap of GR and ER $\alpha$  binding peaks on enhancers based on ChIP-seq data analysis.

### Figure S3 related Figure 3

- (A) ChIP-seq tag density profile of GATA3 on the E<sub>2</sub>-induced Dex-insensitive enhancers in MCF7 cells when treated with different ligands (E<sub>2</sub>, E<sub>2</sub>+Dex).
- (B) A UCSC genome browser (hg18) snapshot showing the ChIP-seq tracks for GATA3 at the *TFF1* and *FOXCI* loci under different treatments (ICI, E<sub>2</sub>, E<sub>2</sub>+Dex). “\*” indicates the position of primers used for qPCR detection.

### Figure S4 related Figure 4

- (A) Western blot analysis showing immunoprecipitated GR wild type or SUMOylation mutants in HEK293T cells upon treatment with E<sub>2</sub>+Dex. (GR-WT: GR wild type; GR-



1KR: GR C-terminal K703R mutation; GR-2KR: GR N-terminal K277R and K293R two sites mutation; GR-3KR: GR K277R, K293R and K703R all three sites mutation)

**(B)** A diagram showing the CRISPR-Cas9-mediated knock-out of GR gene in MCF7 cells.

**(C)** Validation by western blot assay of the GR knock-out stable cell lines. CTL: Cas9 without gRNA transfection into MCF7 cells as a negative control.

**(D)** Western blot analysis of GR wild type and SUMOylation sites mutants in MCF7 knock-out cells following the overexpression of different constructs. (GR-WT:GR wild type; GR-1KR: GR C-terminal K703R mutation; GR-2KR: GR N-terminal K277R and K293R two sites mutation; GR-3KR: GR K277R, K293R and K703R all three sites mutation)

**(E)** The sub-cellular localization of GR wild type and SUMOylation sites mutants were examined by immunostaining in MCF7 cells treated with different ligands (ICI, E<sub>2</sub>, E<sub>2</sub>+Dex). The cells were immunostained for GR (red) and co-stained with DAPI for DNA(blue).

**(F)** Genome browser image showing normalized GRO-seq tag counts and GR ChIP-seq signals in MCF7 cells under different conditions (ICI, ICI+DEX). KLF4 and GADD45G loci are shown. “\*” indicates the position of primers used for qPCR detection.

### **Figure S5 related Figure 5**

**(A)** Validation by RT-qPCR and western blot of the siRNAs knockdown efficiency for NCoR, SMRT in MCF7 cells.

**(B)** ChIP-qPCR showing levels of acetyl-H3K9 on ER $\alpha$ -activated enhancers in MCF7 cells treated with ICI, E<sub>2</sub>, E<sub>2</sub>+DEX. Data are presented as mean  $\pm$  SD. N $\geq$ 3, two-tailed Student's t test.

**(C)** ChIP-qPCR showing NCoR/SMRT complex binding on ER $\alpha$ -activated enhancers in GR wild type and knock-out MCF7 cells treated with E<sub>2</sub>+Dex. ChIP signals are presented

as percentage of input. Data are represented as mean  $\pm$  SD.  $N \geq 3$ , two-tailed Student's t test. GR WT: GR wild type; GR KO: GR knock out.

**Figure S6 related Figure 6**

**(A)** qPCR results showing a similar response to  $E_2$  or Dex treatment of different engineered MCF7 cell lines. Data are represented as mean  $\pm$  SD.  $N \geq 3$ , two-tailed Student's t test.

**(B)** Western blot showing similar protein expression levels of MegaTrans components (i.e. GATA3, RAR $\alpha$  or AP2 $\gamma$ ) for each individual MCF7 cell line when treated with different ligands

**Table S1. All qPCR Primers Used in this Study, Related to Experimental Procedures**

| Name                 | Sequences 5' to 3'         |
|----------------------|----------------------------|
|                      | Gene primers               |
| GR-qPCR-F            | AGCAACATTTGAAGGGCCAG       |
| GR-qPCR-R            | AATGAGAGGCTTGCAGTCCT       |
| $\beta$ actin-qPCR-F | GGA CTT CGA GCA AGA GAT GG |
| $\beta$ actin-qPCR-R | AGC ACT GTG TTG GCG TAC AG |
| Tff1-qPCR-F          | CACCATGGAGAACAAGGTGA       |
| Tff1-qPCR-R          | TGACACCAGGAAAACCACAA       |
| FoxC1-qPCR-F         | AGTCAGCTTGCTTTGAGGCTA      |
| FoxC1-qPCR-R         | AGGCATCACCGTGGTAAGAC       |
| KLF4-qPCR-F          | AGTTCCCATCTCAAGGCACA       |
| KLF4-qPCR-R          | GCCTCTTCATGTGTAAGGCG       |
| GADD45G-qPCR-F       | TGCTGGTTGATCGCACTATG       |
| GADD45G-qPCR-R       | CAAGACTTTGGCTGACTCGT       |
| NCoR-qPCR-F          | GCGTTATGATCAGCTCATGG       |
| NCoR-qPCR-R          | AATGGTGGCTGAAAGACCAG       |
| SMRT-qPCR-F          | GATGACGAGGACTGGCTTTT       |
| SMRT-qPCR-R          | GACAGGTGGGAGGCATAGTC       |
| ER $\alpha$ -qPCR-F  | GACAGGGAGCTGGTTCACAT       |
| ER $\alpha$ -qPCR-R  | AGGATCTCTAGCCAGGCACA       |
|                      | ChIP primers               |
| Tff1e-ChIP-F         | AGGGGATGTGTGTGAGAAGG       |
| Tff1e-ChIP-R         | GCTTCGAGACAGTGGGAGTC       |
| FoxC1e-ChIP-F        | CTGAGGAACACAAGACTAGCC      |
| FoxC1e-ChIP-R        | ACTGGACTCATTTTGGGACATC     |
| KLF4e-ChIP-F         | CCCTCCCTTGGTCAACTTGA       |
| KLF4e-ChIP-R         | ACTTTGCTGCAGGGTGATTG       |
| GADD45Ge-ChIP-F      | CGTTGAACCTGGCTTGTGAA       |
| GADD45Ge-ChIP-R      | GGAGGAAGCGAGGTGTTACT       |

**Table S2. siRNAs and shRNAs Used in this Study, Related to Experimental Procedures**

| siRNAs         |         |                    |                      |
|----------------|---------|--------------------|----------------------|
| Gene           | Company | Catalog number     | Note                 |
| siRNA control  | Sigma   |                    |                      |
| N-CoR          | Sigma   | SASI Hs01_00238946 |                      |
| N-CoR          | Sigma   | SASI Hs02_00341331 |                      |
| SMRT           | Sigma   | SASI Hs02_00312314 |                      |
| SMRT           | Sigma   | SASI Hs02_00312316 |                      |
|                |         |                    |                      |
|                |         |                    |                      |
|                |         |                    |                      |
| shRNAs         |         |                    |                      |
| Gene           | Company | Catalog number     | Note                 |
| pLKO.1 Control | Sigma   | SHC002             | TRC1 control shRNA   |
| pLKO.5 Control | Sigma   | SHC202             | TRC2 control shRNA   |
| GR             | Sigma   | TRCN0000245007     | TRC2 target to 3'UTR |
| GR             | Sigma   | TRCN0000245003     | TRC2                 |
| GR             | Sigma   | TRCN0000245004     | TRC2                 |
| GR             | Sigma   | TRCN0000245005     | TRC2                 |
| ER $\alpha$    | Sigma   | TRCN0000010774     | TRC1                 |
|                |         |                    |                      |

**Table S3. Oligos Used in the GRO-Seq Protocol, Related to Experimental Procedures**

| GRO-seq                      |                                                                            |
|------------------------------|----------------------------------------------------------------------------|
| Name                         | Sequences 5' to 3'                                                         |
| oNTI223                      | pGATCGTCGGACTGTAGAACTCT;CAAGCAGAAGACGGCATAACGATT<br>TTTTTTTTTTTTTTTTTTTTVN |
|                              | p = 5' phosphorylation                                                     |
|                              | ;" = abasic dSpacer furan                                                  |
|                              | VN = degenerate nucleotides                                                |
| oNTI200                      | CAAGCAGAAGACGGCATA                                                         |
| oNTI201                      | AATGATACGGCGACCACCGACAGGTTTCAGAGTTCTACAGTCCGACG                            |
| Illumina small RNAseq primer | CGACAGGTTTCAGAGTTCTACAGTCCGACGATC                                          |

**Table S4. Quality Metrics for ChIP-seq and GRO-seq data, Related to Experimental Procedures**

| Sample name                 | Cell line | Treatment | Total tags | IP efficiency | Total peaks | Peaks on enhancers | NSC      | RSC       |
|-----------------------------|-----------|-----------|------------|---------------|-------------|--------------------|----------|-----------|
| GR $\alpha$ -WT ChIP-seq    | MCF7      | ICI       | 27597732   | 0.01%         | 143         | 64                 | 1.021081 | 0.1468148 |
| GR $\alpha$ -WT ChIP-seq    | MCF7      | ICI+DEX   | 18398153   | 6.65%         | 35003       | 14214              | 1.062842 | 0.1153435 |
| GR $\alpha$ -WT ChIP-seq    | MCF7      | E2        | 16426032   | 0.04%         | 427         | 258                | 1.027229 | 0.1089213 |
| GR $\alpha$ -WT ChIP-seq    | MCF7      | E2+DEX    | 21043422   | 7.76%         | 43133       | 16559              | 1.057018 | 0.1143527 |
| GR $\alpha$ -PboxM-ChIP-seq | MCF7      | ICI       | 20039163   | 0.02%         | 233         | 62                 | 1.017882 | 0.4169963 |
| GR $\alpha$ -PboxM-ChIP-seq | MCF7      | ICI+DEX   | 22918006   | 2.84%         | 25684       | 14037              | 1.077109 | 0.9452748 |
| GR $\alpha$ -PboxM-ChIP-seq | MCF7      | E2        | 13452807   | 0.01%         | 170         | 46                 | 1.028031 | 0.4408001 |
| GR $\alpha$ -PboxM-ChIP-seq | MCF7      | E2+DEX    | 16955432   | 2.99%         | 20273       | 11665              | 1.122758 | 0.9716123 |
| ER $\alpha$ ChIP-seq        | MCF7      | ICI       | 2403400    | 2.2%          | 4141        | 2865               | 1.386406 | 0.3826087 |
| ER $\alpha$ ChIP-seq        | MCF7      | ICI+DEX   | 2967430    | 5.33%         | 10136       | 6225               | 1.075378 | 0.2477626 |
| ER $\alpha$ ChIP-seq        | MCF7      | E2        | 2840623    | 9.4%          | 11574       | 6287               | 1.075378 | 0.2477626 |
| ER $\alpha$ ChIP-seq        | MCF7      | E2+DEX    | 2024047    | 11.3%         | 11196       | 6130               | 3.658976 | 0.6666908 |
| GATA3 ChIP-seq              | MCF7      | ICI       | 26825786   | 0.51%         | 5652        | 3157               | 1.026871 | 0.2622139 |
| GATA3 ChIP-seq              | MCF7      | E2        | 16633206   | 3.2%          | 25123       | 10461              | 1.107312 | 1.028149  |
| GATA3 ChIP-seq              | MCF7      | E2+DEX    | 13424844   | 2.54%         | 19600       | 7791               | 1.095174 | 0.8943474 |
| GRO-seq                     | MCF7      | ICI       | 21084600   |               |             |                    |          |           |
| GRO-seq                     | MCF7      | ICI+DEX   | 18048409   |               |             |                    |          |           |
| GRO-seq                     | MCF7      | E2        | 22856779   |               |             |                    |          |           |
| GRO-seq                     | MCF7      | E2+DEX    | 12451176   |               |             |                    |          |           |
